# Supplementary material for: Enhanced In Vitro Recapitulation of In Vivo Liver Regeneration by Co-Culturing Hepatocyte Organoids with Adipose-Derived Mesenchymal Stem Cells, Alleviating Steatosis and Apoptosis in Acute Alcoholic Liver Injury
Source: MDPI journal article supplement (doi:10.3390/cells13151303), 2024-08-04
Supplement: s1 [file s1]

**Table S1. Primer sequences for target gene amplification.**

| <b>Gene</b>                                                              | <b>Primer sequences</b>                                | <b>GenBank<br/>accession number</b> |
|--------------------------------------------------------------------------|--------------------------------------------------------|-------------------------------------|
| <i>Apolipoprotein B (APOB)</i>                                           | F-CACCAAAACGGAAGCGATTC<br>R-CAGCGGGTAGTAGGAGGAAGAG     | NM_001375388.1                      |
| <i>Low density lipoprotein receptor (LDLR)</i>                           | F-CCCAGCTTTTCCTCCTATGACA<br>R-CCAGTATATGTTGCTGTGGATCCA | NM_001206354.2                      |
| <i>Sterol regulatory element binding transcription factor 1 (SREBF1)</i> | F -CGGACGGCTCACAATGC<br>R -TCGATGATCTTGTCTATTGATGGA    | NM_214157.1                         |
| <i>Perilipin 2 (PLIN2)</i>                                               | F-ACTGGCTGGTAGGTCCCTTTTAT<br>R-CCCGGGACTGAGCATCCT      | NM_214200                           |
| <i>Fatty acid binding protein 1(FABP1)</i>                               | F -TCCAAGGTCGTCCAGAATGAG<br>R -CCCAGTCAGGGTCTCCATCTC   | NM_001004046.2                      |
| <i>Fatty acid synthase (FASN)</i>                                        | F-TCCAAGGTCGTCCAGAATGAG<br>R-CCAGTCAGGGTCTCCATCTC      | NM_001099930.1                      |
| <i>Albumin (ALB)</i>                                                     | F-GAAGACACCAGTGAGCGAAAAA<br>R-AAGCAAGGCCGTCTGTTCA      | NM_001005208.1                      |
| <i>Cytochrome P450 family 3 subfamily A member 29 (CYP3A29)</i>          | F-AGGAGGAGATTGAGGCAACTTTC<br>R-TCTGTGCCAGGGCATCGTA     | NM_214423.1                         |
| <i>Cytochrome P450 family 1 subfamily A member 2 (CYP1A2)</i>            | F-GGCAGGGCGACGATTTC<br>R-TCAGTGACCAGAGTGAAGCTGTAGA     | NM_001159614.1                      |
| <i>Cytochrome P450 family 2 subfamily E member 1(CYP2E1)</i>             | F-GCAGGAAAGCGGGTGTGT<br>R-CAGCCATGAACASGAACAGTTC       | NM_214421.1                         |
| <i>CDKN1A cyclin dependent kinase inhibitor 1A (CDKN1A, p21)</i>         | F-CCTCCCAGGGCAGGAAA<br>R-GCGTTTGGAGTGGTAGAAATCTG       | XM_013977858.2                      |
| <i>Caspase 8 (CASP8)</i>                                                 | F-GGGAAGCCCCCATCTATGA<br>R-CCCTTGACAAGCCTGAATGAA       | NM_001031779                        |
| <i>BCL2 antagonist/killer 1 (BAK1)</i>                                   | F-TCACCTGCCCCTAGAACCT<br>R-CTGGAATTCCGAGTCGTATCG       | XM_001928147.2                      |
| <i>BCL2 apoptosis regulator (BCL2L1)</i>                                 | F-GGTACCGG GGGCATTTCAGT<br>R-TCCCGGAAGAGTTCGTTCAA      | NM_214285.1                         |
| <i>Hypoxanthine phosphoribosyltransferase 1 (HPRT1)</i>                  | F-CGGCTTGCTCGAGATGTGAT<br>R-AGCACACAGAGGGCTACGATGT     | NM_001032376.2                      |

**Table S2. Expression profiles of liver transcription factors in hepatocyte organoids**

| Genes |       | Fold change values [ $\log_2$ Each group/primary hepatocytes, (PH)] |              |              |              |              |
|-------|-------|---------------------------------------------------------------------|--------------|--------------|--------------|--------------|
|       |       | Group 1                                                             | Group 2      | Group 3      | Group 4      | Liver        |
| 1     | CEBPA | 1.55                                                                | 1.13         | 1.10         | -1.67        | <b>2.31</b>  |
| 2     | FOXA1 | -1.13                                                               | -1.18        | 1.21         | -1.46        | 1.38         |
| 3     | FOXA2 | -1.16                                                               | -1.87        | <b>-2.22</b> | <b>-2.40</b> | -1.76        |
| 4     | FOXA3 | <b>2.42</b>                                                         | 1.86         | 1.90         | 1.28         | 1.26         |
| 5     | GATA6 | 1.39                                                                | 1.55         | 1.81         | 1.69         | 1.72         |
| 6     | HNF1A | 1.38                                                                | -1.07        | -1.32        | -1.65        | 1.80         |
| 7     | HNF1B | 1.09                                                                | -1.67        | -1.02        | -1.03        | <b>-6.65</b> |
| 8     | HNF4A | 1.78                                                                | 1.35         | 1.39         | 1.20         | 1.84         |
| 9     | HNF4G | <b>-6.15</b>                                                        | <b>-3.92</b> | <b>-5.77</b> | <b>-7.32</b> | <b>-2.07</b> |
| 10    | KLF15 | <b>-2.23</b>                                                        | <b>-2.44</b> | <b>-3.16</b> | <b>-3.89</b> | 1.85         |
| 11    | PPARA | 1.07                                                                | -1.10        | 1.20         | 1.56         | <b>4.69</b>  |

\*For genes exhibiting a fold change greater than 2, the p-value was less than 0.05.

**Table S3. Transcript expression patterns during the lifespan and proliferation of hepatocyte organoids**

| Genes |        | Fold change values [ $\log_2$ Each group/primary hepatocytes, (PH)] |         |         |         |        |
|-------|--------|---------------------------------------------------------------------|---------|---------|---------|--------|
|       |        | Group 1                                                             | Group 2 | Group 3 | Group 4 | Liver  |
| 1     | BAK1   | 4.52                                                                | 4.48    | 5.78    | 6.01    | 1.20   |
| 2     | BCL2   | 3.80                                                                | 3.95    | 6.05    | 4.22    | 1.00   |
| 3     | BCL2L1 | 4.63                                                                | 4.47    | 6.39    | 8.65    | -1.26  |
| 4     | CDKN1A | 3.25                                                                | 2.72    | 3.95    | 4.67    | 1.26   |
| 5     | TEP1   | 2.81                                                                | 3.42    | 3.01    | 4.35    | 1.21   |
| 6     | TERT   | 650.24                                                              | 776.32  | 1479.02 | 1693.45 | 306.01 |
| 7     | TP53   | 3.69                                                                | 3.06    | 1.93    | 2.08    | 1.19   |

\* For genes exhibiting a fold change greater than 2, the p-value was less than 0.05.

**Table S4. Metabolic transcript expression patterns of CYP enzymes in hepatocyte organoids**

| Genes |         | Fold change values [ $\log_2$ Each group/primary hepatocytes, (PH)] |          |          |          |         |
|-------|---------|---------------------------------------------------------------------|----------|----------|----------|---------|
|       |         | Group 1                                                             | Group 2  | Group 3  | Group 4  | Liver   |
| 1     | CYP1A1  | -1.19                                                               | -1.68    | 2.54     | 3.07     | -1.43   |
| 2     | CYP1A2  | -279.86                                                             | -316.98  | -166.52  | -140.98  | 8.38    |
| 3     | CYP20A1 | 1.62                                                                | 2.67     | 1.57     | 1.75     | -2.88   |
| 4     | CYP26A1 | -1856.92                                                            | -2290.80 | -2261.41 | -2266.31 | -1.17   |
| 5     | CYP27A1 | -1.72                                                               | -2.50    | -2.00    | -3.96    | 2.3     |
| 6     | CYP27B1 | 1.10                                                                | -1.01    | -1.27    | -1.05    | 1.54    |
| 7     | CYP2A19 | -1101.12                                                            | -33.88   | -1340.88 | -1343.78 | 2155.73 |
| 8     | CYP2B22 | -4.78                                                               | -5.00    | -5.18    | -2.34    | 81.73   |
| 9     | CYP2C32 | -3.19                                                               | -9.80    | 4.87     | 1.56     | 7.03    |
| 10    | CYP2C33 | -3.21                                                               | -2.47    | -2.45    | -2.68    | 1.07    |
| 11    | CYP2C34 | 1.07                                                                | -1.77    | 6.50     | 2.94     | 19.21   |
| 12    | CYP2C36 | -4.96                                                               | -7.25    | 1.31     | -1.98    | 9.38    |
| 13    | CYP2C42 | -9.87                                                               | -22.56   | -2.80    | -8.26    | 1.49    |
| 14    | CYP2C49 | -11.46                                                              | -28.92   | 1.00     | -2.86    | 9.54    |
| 15    | CYP2C91 | 1.03                                                                | -2.68    | 4.52     | 2.44     | -1.38   |
| 16    | CYP2D25 | -3.16                                                               | -3.81    | -1.88    | -3.48    | 3.79    |
| 17    | CYP2E1  | -3.97                                                               | -9.59    | -2.20    | -2.70    | 1.55    |
| 18    | CYP2J34 | -1.54                                                               | -2.02    | 1.19     | 2.04     | 9.90    |
| 19    | CYP2R1  | 1.49                                                                | 2.00     | 2.60     | 2.27     | -1.56   |
| 20    | CYP39A1 | -3.98                                                               | -3.14    | -3.09    | -4.48    | -1.90   |
| 21    | CYP3A22 | -1.71                                                               | -2.11    | -1.12    | -3.95    | 2.73    |
| 22    | CYP3A29 | 4.37                                                                | 4.33     | 6.05     | 6.55     | 25.90   |
| 23    | CYP3A46 | 11.20                                                               | 12.79    | 22.47    | 23.07    | 20.93   |
| 24    | CYP4A21 | -1.27                                                               | -1.49    | -1.92    | -2.81    | 2.46    |
| 25    | CYP4A24 | -2.11                                                               | -2.54    | -3.18    | -4.69    | 1.66    |
| 26    | CYP4F2  | -13.48                                                              | -6.62    | -10.54   | -24.55   | 4.38    |
| 27    | CYP4F55 | -22.32                                                              | -18.43   | -18.19   | -23.30   | 2.96    |
| 28    | CYP4V2  | -33.66                                                              | -13.68   | -28.89   | -10.93   | 1.22    |
| 29    | CYP51   | 2.23                                                                | 2.68     | 3.31     | 1.90     | 1.44    |
| 30    | CYP7A1  | -27.47                                                              | -2363.33 | -112.67  | -2338.06 | 19.20   |
| 31    | CYP8B1  | 955.77                                                              | 893.59   | 1032.33  | 1312.98  | 2880.03 |

\* For genes exhibiting a fold change greater than 2, the p-value was less than 0.05.

**Table S5. Transcript expression patterns of triglyceride and cholesterol metabolism in hepatocyte organoids**

| Genes |         | Fold change values [ $\log_2$ Each group/primary hepatocytes, (PH)] |              |               |               |                |
|-------|---------|---------------------------------------------------------------------|--------------|---------------|---------------|----------------|
|       |         | Group 1                                                             | Group 2      | Group 3       | Group 4       | Liver          |
| 1     | ABCA1   | 1.36                                                                | 1.98         | 1.57          | <b>2.15</b>   | -1.71          |
| 2     | ABCA3   | <b>2.50</b>                                                         | 1.99         | 1.49          | 1.55          | 1.15           |
| 3     | ABCA4   | <b>-7.43</b>                                                        | <b>-5.59</b> | <b>-10.38</b> | <b>-6.51</b>  | <b>-8.90</b>   |
| 4     | ABCA5   | <b>-2.45</b>                                                        | -1.66        | -1.37         | -1.34         | <b>-2.37</b>   |
| 5     | ABCA6   | -1.75                                                               | -1.87        | -1.88         | <b>-2.13</b>  | -1.27          |
| 6     | ABCA7   | <b>169.04</b>                                                       | <b>59.64</b> | <b>329.45</b> | <b>525.79</b> | <b>1816.20</b> |
| 7     | ABCG1   | <b>117.23</b>                                                       | <b>71.73</b> | <b>207.01</b> | <b>270.06</b> | <b>77.68</b>   |
| 8     | ABCG5   | -1.77                                                               | -1.73        | <b>-2.69</b>  | <b>-7.11</b>  | <b>-2.56</b>   |
| 9     | ABCG8   | <b>-3.22</b>                                                        | <b>-5.52</b> | <b>-4.42</b>  | <b>-7.31</b>  | -1.35          |
| 10    | APOA1   | 1.59                                                                | -1.28        | 1.19          | -1.09         | <b>-2.14</b>   |
| 11    | APOB    | <b>-2.00</b>                                                        | -1.45        | -1.50         | -1.30         | <b>-2.61</b>   |
| 12    | APOBR   | <b>-26.19</b> (p>0.05)                                              | -1.56        | 1.48          | -1.54         | <b>79.80</b>   |
| 13    | DGAT1   | -1.03                                                               | -1.97        | 1.14          | -1.29         | 1.86           |
| 14    | DGAT2   | <b>-4.28</b>                                                        | <b>-5.50</b> | <b>-6.73</b>  | <b>-20.29</b> | 1.44           |
| 15    | FASN    | <b>15.96</b>                                                        | <b>6.10</b>  | <b>12.79</b>  | <b>9.65</b>   | <b>2.30</b>    |
| 16    | FABP1   | -1.20                                                               | -1.75        | <b>-4.10</b>  | <b>-6.93</b>  | -1.21          |
| 17    | HMGCR   | <b>25.55</b>                                                        | <b>19.50</b> | <b>42.99</b>  | <b>30.16</b>  | <b>2.02</b>    |
| 18    | LCAT    | <b>-2.72</b>                                                        | <b>-3.51</b> | <b>-3.34</b>  | <b>-3.86</b>  | -1.66          |
| 19    | LDLR    | <b>3.59</b>                                                         | <b>2.46</b>  | <b>3.14</b>   | <b>2.57</b>   | 1.97           |
| 20    | LDLRAD3 | <b>-9.61</b>                                                        | <b>-9.69</b> | <b>-16.43</b> | <b>-6.42</b>  | 1.21           |
| 21    | LDLRAD4 | <b>-3.52</b>                                                        | <b>-4.28</b> | <b>-6.61</b>  | <b>-2.71</b>  | 1.49           |
| 22    | LDLRAP1 | <b>2.45</b>                                                         | <b>2.13</b>  | 1.63          | 1.87          | <b>3.67</b>    |
| 23    | NPC1    | <b>5.56</b>                                                         | <b>4.53</b>  | <b>7.25</b>   | <b>6.26</b>   | -1.08          |
| 24    | NPC1L1  | <b>33.47</b>                                                        | <b>22.02</b> | <b>31.35</b>  | <b>9.93</b>   | <b>15.30</b>   |
| 25    | NR1H3   | 1.59                                                                | 1.38         | 1.25          | -1.01         | 1.39           |
| 26    | PCSK9   | <b>4.36</b>                                                         | <b>2.07</b>  | <b>2.20</b>   | 1.25          | <b>2.66</b>    |
| 27    | PLIN2   | 1.37                                                                | 1.78         | 1.39          | 1.34          | <b>-3.05</b>   |
| 28    | PPARA   | 1.07                                                                | -1.10        | 1.20          | 1.56          | <b>4.69</b>    |
| 29    | SCARB1  | <b>2.09</b>                                                         | 1.71         | 1.97          | 1.72          | -1.32          |
| 30    | SOAT1   | <b>2.51</b>                                                         | <b>3.00</b>  | <b>2.85</b>   | <b>2.32</b>   | <b>-2.67</b>   |
| 31    | SOAT2   | 1.29                                                                | -1.21        | 1.59          | 1.00          | <b>-4.10</b>   |
| 32    | SREBF1  | <b>7.31</b>                                                         | <b>3.45</b>  | <b>4.43</b>   | <b>4.30</b>   | -1.36          |
| 33    | SREBF2  | <b>3.45</b>                                                         | <b>2.21</b>  | <b>2.46</b>   | 1.99          | 1.50           |
| 34    | VLDLR   | <b>37.36</b>                                                        | <b>39.43</b> | <b>61.19</b>  | <b>194.86</b> | <b>65.72</b>   |

\*Genes with fold changes greater than 2 were labeled with "p > 0.05" next to the gene name if their p-value exceeded 0.05

**Table S6. Expression profiles of alcohol-degrading transcripts in hepatocyte organoids**

| Genes |         | Fold change values [log <sub>2</sub> Each group/primary hepatocytes, (PH)] |               |               |               |                |
|-------|---------|----------------------------------------------------------------------------|---------------|---------------|---------------|----------------|
|       |         | Group 1                                                                    | Group 2       | Group 3       | Group 4       | Liver          |
| 1     | ADH1C   | <b>-17.43</b>                                                              | <b>-15.21</b> | <b>-78.33</b> | <b>-33.99</b> | -1.15          |
| 2     | ADH4    | <b>-20.77</b>                                                              | <b>-12.89</b> | <b>-12.82</b> | <b>-18.88</b> | <b>4.14</b>    |
| 3     | ADH5    | <b>-2.01</b>                                                               | <b>-2.21</b>  | <b>-2.02</b>  | <b>-2.68</b>  | <b>-3.39</b>   |
| 4     | ADHFE1  | <b>-2.98</b>                                                               | <b>-2.95</b>  | <b>-6.40</b>  | <b>-6.97</b>  | <b>2.41</b>    |
| 5     | ALDH1A1 | <b>2.13</b>                                                                | <b>2.48</b>   | <b>3.12</b>   | <b>2.77</b>   | 1.38           |
| 6     | ALDH1A2 | <b>-2.31</b>                                                               | -1.92         | -1.88         | -1.26         | <b>8.65</b>    |
| 7     | ALDH1A3 | -1.89                                                                      | <b>-73.53</b> | 1.10          | <b>3.08</b>   | <b>6.30</b>    |
| 8     | ALDH1B1 | -1.35                                                                      | -1.49         | -1.20         | -1.94         | <b>-2.92</b>   |
| 9     | ALDH1L1 | 1.91                                                                       | 1.31          | <b>2.15</b>   | -1.02         | <b>5.92</b>    |
| 10    | ALDH1L2 | <b>3.93</b>                                                                | <b>4.67</b>   | <b>2.21</b>   | <b>2.28</b>   | -3.66          |
| 11    | ALDH2   | -1.80                                                                      | <b>-2.08</b>  | <b>-2.11</b>  | <b>-2.92</b>  | 1.29           |
| 12    | ALDH3A1 | -1.16                                                                      | -1.27         | -1.94         | 1.21          | <b>-174.04</b> |
| 13    | ALDH3A2 | -1.59                                                                      | <b>-2.20</b>  | -1.73         | <b>-2.01</b>  | 1.11           |
| 14    | ALDH3B1 | 1.44                                                                       | 1.23          | 1.60          | 1.18          | <b>-2.47</b>   |
| 15    | ALDH4A1 | 1.24                                                                       | -1.12         | 1.07          | -1.47         | 1.99           |
| 16    | ALDH7A1 | -1.91                                                                      | -1.54         | -1.67         | <b>-2.21</b>  | 1.69           |

\*For genes exhibiting a fold change greater than 2, the p-value was less than 0.05.

**Table S7.** Transcript expression patterns of cadherins and cell adhesion molecules in hepatocyte organoids

| Genes |         | Fold change values [log <sub>2</sub> Each group/primary hepatocytes, (PH)] |                       |                        |                 |                |
|-------|---------|----------------------------------------------------------------------------|-----------------------|------------------------|-----------------|----------------|
|       |         | Group 1                                                                    | Group 2               | Group 3                | Group 4         | Liver          |
| 1     | ALCAM   | -1.31                                                                      | 1.28                  | -1.09                  | -1.01           | -1.52          |
| 2     | BCAM    | 1.08                                                                       | -1.16                 | 1.56                   | <b>4.31</b>     | <b>2.82</b>    |
| 3     | CADM1   | <b>-3.03</b>                                                               | <b>-2.60</b>          | <b>-2.62</b>           | -1.19           | 1.71           |
| 4     | CADM2   | <b>-227.74</b>                                                             | <b>-280.75</b>        | <b>-277.16</b>         | <b>-19.67</b>   | -1.65          |
| 5     | CADM3   | <b>16.28</b> (p>0.05)                                                      | 1.00                  | 1.00                   | 1.00            | <b>97.71</b>   |
| 6     | CADM4   | <b>2.36</b>                                                                | 1.85                  | <b>2.51</b>            | <b>3.28</b>     | 1.63           |
| 7     | CDH1    | -1.45                                                                      | -1.29                 | -1.08                  | 1.34            | -1.06          |
| 8     | CDH11   | 1.00                                                                       | <b>144.34</b>         | <b>375.43</b>          | <b>18112.87</b> | <b>901.16</b>  |
| 9     | CDH13   | -1.37                                                                      | -1.16                 | <b>-2.09</b>           | <b>4.62</b>     | <b>2.77</b>    |
| 10    | CDH19   | 1.00                                                                       | 1.00                  | 1.00                   | 1.00            | <b>261.38</b>  |
| 11    | CDH2    | <b>-2.40</b>                                                               | -1.85                 | <b>-2.77</b>           | <b>-3.05</b>    | <b>-2.02</b>   |
| 12    | CDH20   | 1.00                                                                       | 1.00                  | 1.00                   | 1.00            | <b>82.83</b>   |
| 13    | CDH23   | <b>-2.06</b> (p>0.05)                                                      | <b>3.65</b> (p>0.05)  | <b>2.80</b> (p>0.05)   | <b>7.37</b>     | <b>19.97</b>   |
| 14    | CDH24   | <b>115.57</b>                                                              | <b>131.31</b>         | <b>322.88</b>          | <b>742.27</b>   | <b>834.21</b>  |
| 15    | CDH3    | <b>-17.80</b> (p>0.05)                                                     | -1.55                 | <b>5.86</b>            | <b>25.98</b>    | <b>6.15</b>    |
| 16    | CDH4    | 1.00                                                                       | 1.00                  | 1.00                   | 1.00            | <b>172.11</b>  |
| 17    | CDH5    | <b>-59.78</b>                                                              | <b>-73.53</b>         | <b>-72.60</b>          | <b>-72.75</b>   | <b>194.93</b>  |
| 18    | CDH6    | 1.00                                                                       | <b>137.82</b>         | <b>138.95</b>          | <b>919.39</b>   | <b>82.83</b>   |
| 19    | CDH7    | <b>-51.39</b>                                                              | -1.58                 | <b>-62.37</b>          | -1.55           | <b>25.75</b>   |
| 20    | CDHR1   | 1.00                                                                       | 1.00                  | 1.00                   | 1.00            | <b>75.39</b>   |
| 21    | CDHR2   | <b>21.13</b>                                                               | <b>12.77</b>          | <b>62.84</b>           | <b>14.24</b>    | <b>-8.33</b>   |
| 22    | CDHR3   | 1.00                                                                       | <b>46.61</b>          | 1.00                   | 1.00            | <b>134.91</b>  |
| 23    | CDHR4   | 1.94                                                                       | -1.08                 | 1.50                   | -1.17           | <b>2.25</b>    |
| 24    | CDHR5   | 1.07                                                                       | -1.46                 | -1.71                  | <b>-3.71</b>    | <b>7.87</b>    |
| 25    | CEACAM1 | <b>-3.23</b>                                                               | <b>-2.64</b>          | <b>-3.33</b>           | <b>-2.51</b>    | 1.13           |
| 26    | CERCAM  | <b>7.00</b>                                                                | <b>4.80</b>           | <b>5.12</b>            | <b>3.61</b>     | -1.18          |
| 27    | CHL1    | 1.00                                                                       | 1.00                  | <b>92.97</b>           | <b>138.76</b>   | <b>1503.75</b> |
| 28    | CXADR   | <b>2.71</b>                                                                | <b>3.81</b>           | <b>4.09</b>            | <b>6.09</b>     | <b>-2.94</b>   |
| 29    | EPCAM   | <b>2.02</b>                                                                | <b>2.77</b>           | <b>9.60</b>            | <b>5.84</b>     | <b>-5.47</b>   |
| 30    | ESAM    | <b>-2.89</b>                                                               | <b>-166.78</b>        | <b>-2.06</b> (p>0.05)  | -1.00           | <b>30.21</b>   |
| 31    | ICAM1   | <b>8.72</b>                                                                | <b>9.31</b>           | <b>4.63</b>            | <b>14.43</b>    | <b>3.76</b>    |
| 32    | ICAM2   | -2.00                                                                      | <b>-6.78</b>          | <b>-4.90</b>           | <b>-5.34</b>    | <b>2.06</b>    |
| 33    | ICAM3   | <b>9.27</b>                                                                | <b>7.25</b>           | <b>4.60</b>            | <b>2.21</b>     | <b>21.85</b>   |
| 34    | L1CAM   | 1.00                                                                       | <b>27.06</b> (p>0.05) | <b>244.05</b>          | <b>73.16</b>    | <b>3839.71</b> |
| 35    | MADCAM1 | <b>12.07</b>                                                               | <b>6.64</b>           | <b>-21.46</b> (p>0.05) | <b>9.20</b>     | <b>48.01</b>   |
| 36    | MCAM    | -1.94                                                                      | <b>7.30</b>           | <b>-2.37</b>           | <b>9.70</b>     | <b>20.91</b>   |
| 37    | NECTIN2 | -1.16                                                                      | -1.57                 | 1.28                   | 1.08            | 1.18           |
| 38    | NECTIN3 | -1.88                                                                      | -1.33                 | -1.74                  | -1.61           | -1.44          |
| 39    | NECTIN4 | <b>184.32</b>                                                              | <b>229.03</b>         | <b>290.04</b>          | <b>584.83</b>   | <b>97.71</b>   |
| 40    | NRCAM   | <b>46.83</b>                                                               | <b>79.18</b>          | <b>99.53</b>           | <b>79.72</b>    | <b>514.32</b>  |
| 41    | PCDH1   | <b>3.29</b>                                                                | 1.99                  | <b>5.75</b>            | <b>7.05</b>     | <b>8.22</b>    |
| 42    | PCDH12  | 1.00                                                                       | 1.00                  | 1.00                   | <b>66.60</b>    | <b>2046.82</b> |
| 43    | PCDH17  | <b>-34.59</b> (p>0.05)                                                     | <b>-2.07</b> (p>0.05) | -1.54                  | <b>16.89</b>    | <b>11.31</b>   |
| 44    | PCDH18  | <b>-311.72</b>                                                             | <b>-384.36</b>        | <b>-379.44</b>         | <b>3.61</b>     | <b>25.60</b>   |
| 45    | PCDH19  | 1.27                                                                       | -1.49                 | 1.67                   | 1.28            | <b>2.51</b>    |
| 46    | PCDH7   | 1.00                                                                       | 1.00                  | <b>27.28</b> (p>0.05)  | <b>519.23</b>   | <b>201.86</b>  |
| 47    | PCDHB6  | 1.16                                                                       | -1.93                 | <b>-5.48</b>           | 1.68            | 1.15           |
| 48    | PECAM1  | -1.49                                                                      | -1.36                 | -1.86                  | <b>-4.02</b>    | 1.64           |

|    |       |             |             |             |             |              |
|----|-------|-------------|-------------|-------------|-------------|--------------|
| 49 | SDK2  | -1.15       | -1.87       | 1.30        | <b>2.38</b> | -1.62        |
| 50 | VCAM1 | <b>7.99</b> | <b>9.18</b> | <b>5.32</b> | <b>7.61</b> | <b>-2.08</b> |

\* Genes with fold changes > 2 were marked "p > 0.05" if p > 0.05.



**Table S8.** Extracellular matrix transcript expression patterns in hepatocyte organoids

| Genes |          | Fold changes [ $\log_2$ Each group/primary hepatocytes, (PH, control)] |               |               |               |              |
|-------|----------|------------------------------------------------------------------------|---------------|---------------|---------------|--------------|
|       |          | Group 1                                                                | Group 2       | Group 3       | Group 4       | Liver        |
| 1     | ADAMTSL1 | -42.99(p>0.05)                                                         | -52.81        | -52.14        | 6.55          | 34.65        |
| 2     | ADAMTSL2 | -328.52                                                                | -405.08       | -399.90       | -5.48         | 53.00        |
| 3     | ADAMTSL3 | 54.47                                                                  | 40.09(p>0.05) | 53.55         | 374.91        | 566.39       |
| 4     | ADAMTSL4 | -4.46                                                                  | -4.37         | -2.99         | -2.05         | 2.29         |
| 5     | ADAMTSL5 | 9.50                                                                   | 12.64         | 42.91         | 32.08         | 7.78         |
| 6     | COL11A1  | 7.35                                                                   | 6.94          | 1.88          | 69.00         | 30.13        |
| 7     | COL12A1  | 1.00                                                                   | 40.09(p>0.05) | 322.88        | 16978.01      | 3118.09      |
| 8     | COL13A1  | 1.00                                                                   | 66.15         | 1.00          | 53.48         | 886.28       |
| 9     | COL14A1  | -15.44                                                                 | -2.73         | -1.13         | 23.48         | 15.61        |
| 10    | COL15A1  | 1.00                                                                   | 40.09         | 198.07        | 15613.55      | 417.60       |
| 11    | COL16A1  | 11.11                                                                  | 12.18         | 8.52          | 61.69         | 10.04        |
| 12    | COL18A1  | -4.50                                                                  | -9.25         | -8.80         | -7.11         | -2.89        |
| 13    | COL19A1  | 1.00                                                                   | 1.00          | 1.00          | 1.00          | 365.53       |
| 14    | COL1A1   | -1.75                                                                  | 2.09          | 16.21         | 1424.05       | 43.97        |
| 15    | COL1A2   | -6.74                                                                  | -1.01         | 4.52          | 404.34        | 35.26        |
| 16    | COL21A1  | 5.39                                                                   | 7.16          | 93.28         | 26.80         | 32.12        |
| 17    | COL23A1  | 1.00                                                                   | 14.03(p>0.05) | 1.00          | 1385.14       | 120.03       |
| 18    | COL24A1  | -2.04                                                                  | -1.69         | -7.32         | -5.22         | -1.83        |
| 19    | COL26A1  | 7.66                                                                   | 4.58          | 2.54(p>0.05)  | 1.27          | 1.70         |
| 20    | COL27A1  | 12.46                                                                  | 11.18         | 7.09          | 14.89         | 2.40         |
| 21    | COL28A1  | 8.30                                                                   | 9.23          | 9.41          | 6.40          | -3.38        |
| 22    | COL3A1   | -2.68                                                                  | -1.40         | 2.71          | 148.20        | 47.67        |
| 23    | COL4A1   | -1.67                                                                  | 1.79          | 3.74          | 97.71         | 21.91        |
| 24    | COL4A2   | -1.22                                                                  | 2.69          | 6.55          | 117.53        | 27.26        |
| 25    | COL4A3   | 1.00                                                                   | 1.00          | 375.43        | 1627.85       | 774.69       |
| 26    | COL4A3BP | -2.34                                                                  | -1.32         | -1.48         | -1.55         | -1.77        |
| 27    | COL4A4   | 1.72                                                                   | 1.94          | 2.94          | 59.84         | 10.64        |
| 28    | COL4A5   | -5.97                                                                  | -3.32         | -6.16         | 5.69          | 9.07         |
| 29    | COL4A6   | -51.39                                                                 | -63.17        | -62.37        | -1.17         | 30.11        |
| 30    | COL5A1   | -1.32                                                                  | 1.41          | 6.75          | 276.26        | 34.00        |
| 31    | COL5A2   | -1.50                                                                  | -1.15         | 1.33          | 29.03         | 4.36         |
| 32    | COL5A3   | -68.18                                                                 | -1.41         | -4.00         | 14.63         | 30.95        |
| 33    | COL6A3   | 1.00                                                                   | 352.83        | 690.74        | 96956.24      | 6012.00      |
| 34    | COL6A5   | 1.00                                                                   | 1.00          | 1.00          | 1.00          | 6309.57      |
| 35    | COL6A6   | -185.75                                                                | -11.14        | -4.22         | -8.32         | 3.27         |
| 36    | COL7A1   | 1.14                                                                   | 1.02          | 3.42          | 69.82         | 2.99         |
| 37    | COL8A1   | -4.80                                                                  | -4.68         | -7.76         | -1.71         | -10.84       |
| 38    | COL8A2   | 1.00                                                                   | 1.00          | 1.00          | 27.24(p>0.05) | 157.23       |
| 39    | COL9A3   | 3.41                                                                   | 2.45          | 1.63          | 15.00         | -1.77        |
| 40    | ELN      | 1.00                                                                   | 1.00          | 1.00          | 315.87        | 1764.13      |
| 41    | FBLN1    | -1.29                                                                  | -2.52         | -1.72         | -3.13         | 3.40         |
| 42    | FBLN2    | 16.28(p>0.05)                                                          | 1.00          | 171.79        | 1752.49       | 1883.16      |
| 43    | FBLN5    | -51.39                                                                 | -63.17        | -1.04         | 61.62         | 168.31       |
| 44    | FN1      | -1.41                                                                  | -1.63         | -1.90         | -1.29         | -1.89        |
| 45    | LAMA1    | 53.02                                                                  | 66.64         | 5.35          | 30.17         | 2.33(p>0.05) |
| 46    | LAMA2    | 4.44                                                                   | 4.31          | -2.37         | -1.48         | 3.66         |
| 47    | LAMA3    | -2.50                                                                  | -3.00         | 1.94          | 2.20          | -5.71        |
| 48    | LAMA4    | 1.00                                                                   | 1.00          | 14.14(p>0.05) | 1745.93       | 1340.08      |
| 49    | LAMA5    | 4.05                                                                   | 2.63          | 3.54          | 5.51          | -1.04        |

|    |        |               |         |         |          |        |
|----|--------|---------------|---------|---------|----------|--------|
| 50 | LAMB1  | 4.09          | 4.98    | 3.83    | 5.42     | 1.24   |
| 51 | LAMB2  | -2.90         | -3.27   | -4.35   | 2.18     | 6.26   |
| 52 | LAMB3  | 2.26          | 1.26    | 2.99    | 2.27     | 3.49   |
| 53 | LAMB4  | -3.28         | -1.88   | -4.38   | -12.98   | -1.24  |
| 54 | LAMC1  | 4.06          | 4.62    | 4.71    | 8.02     | -1.09  |
| 55 | LAMC2  | 20.84         | 34.04   | 101.72  | 402.25   | 4.85   |
| 56 | LTBP1  | 1.27          | 2.03    | 3.93    | 36.66    | 72.75  |
| 57 | LTBP2  | -1.53         | -1.58   | 2.33    | 36.87    | 42.89  |
| 58 | LTBP3  | 1.05          | 1.19    | 1.37    | 7.14     | 6.28   |
| 59 | LTBP4  | -2.09(p>0.05) | -10.64  | -1.92   | 1.46     | 43.54  |
| 60 | MMP2   | 1.13          | 5.60    | 26.82   | 984.45   | 39.85  |
| 61 | SP1    | 1.10          | 1.29    | 1.32    | 1.67     | 1.36   |
| 62 | SP3    | -1.88         | -1.09   | -1.53   | -1.36    | -2.01  |
| 63 | TGFB1  | 31.93         | 32.02   | 38.06   | 136.62   | 70.76  |
| 64 | TGFBR1 | 4.58          | 7.39    | 8.21    | 13.59    | 1.76   |
| 65 | TGFBR2 | 1.31          | 1.16    | 2.07    | 2.92     | 3.13   |
| 66 | TIMP1  | 4897.06       | 6418.56 | 4270.85 | 14695.16 | 730.06 |
| 67 | TIMP2  | 1.01          | 4.02    | 11.02   | 460.56   | 71.13  |
| 68 | TIMP3  | 1.39          | 1.58    | 1.56    | 8.48     | 1.43   |

\*Genes with fold changes greater than 2 were labeled with "p > 0.05" next to the gene name if their p-value exceeded 0.05

Supplementary Figure Legends

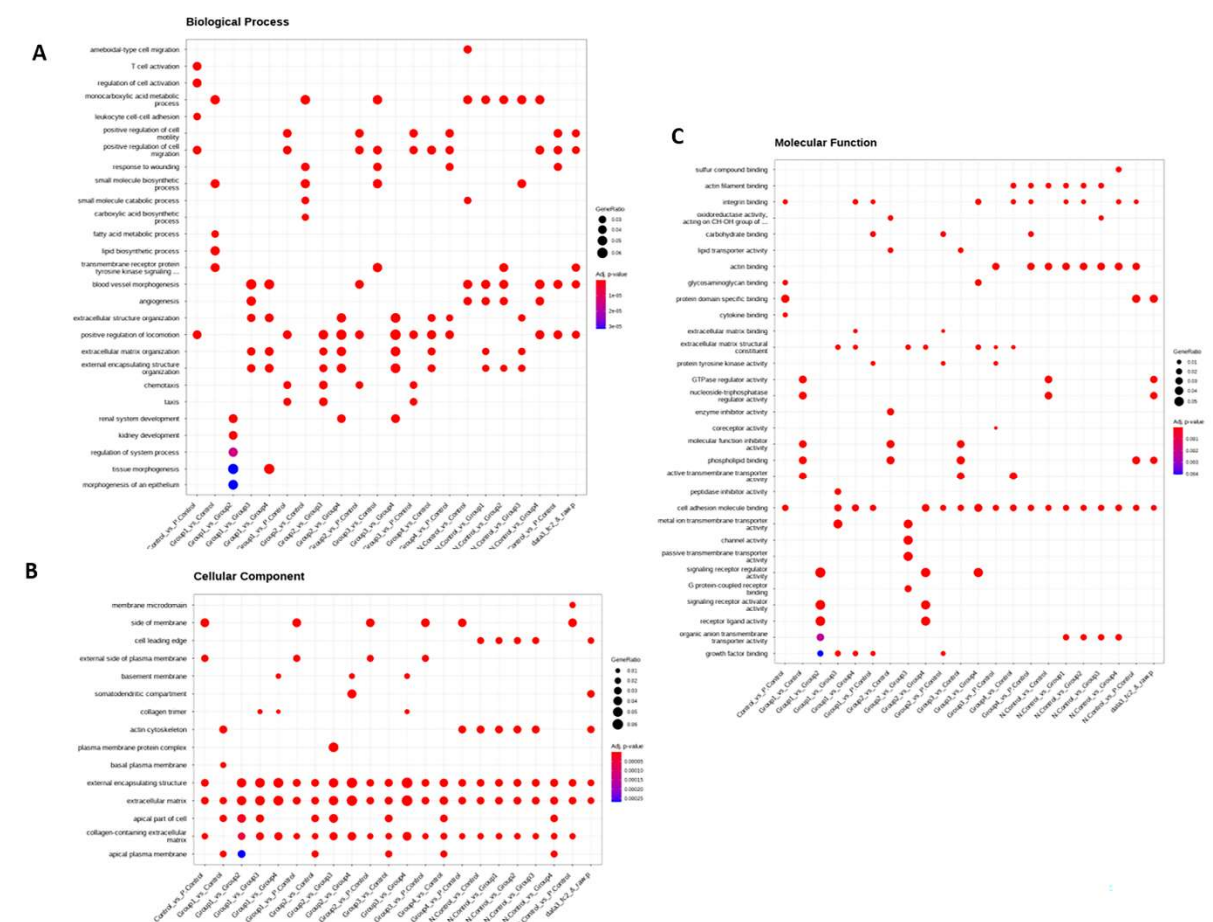

**Figure S1. Gene Ontology (GO) analysis results of hepatocyte organoids (HOs).** Analysis of (A) biological processes, (B) molecular functions, and (C) cellular components. The groups were divided as follows: at passage 0, 14-day-old hepatocyte organoids (HOs) cultured alone (Group 1, G1) or co-cultured with A-MSCs (Group 2, G2), and at passage 2, 42-day-old HOs cultured alone (Group 3, G3) or co-cultured with A-MSCs (Group 4, G4). Liver, primary hepatocytes (PH), and ear fibroblasts (EF) were used as the positive controls (PC), controls (C), and negative controls (NC), respectively.

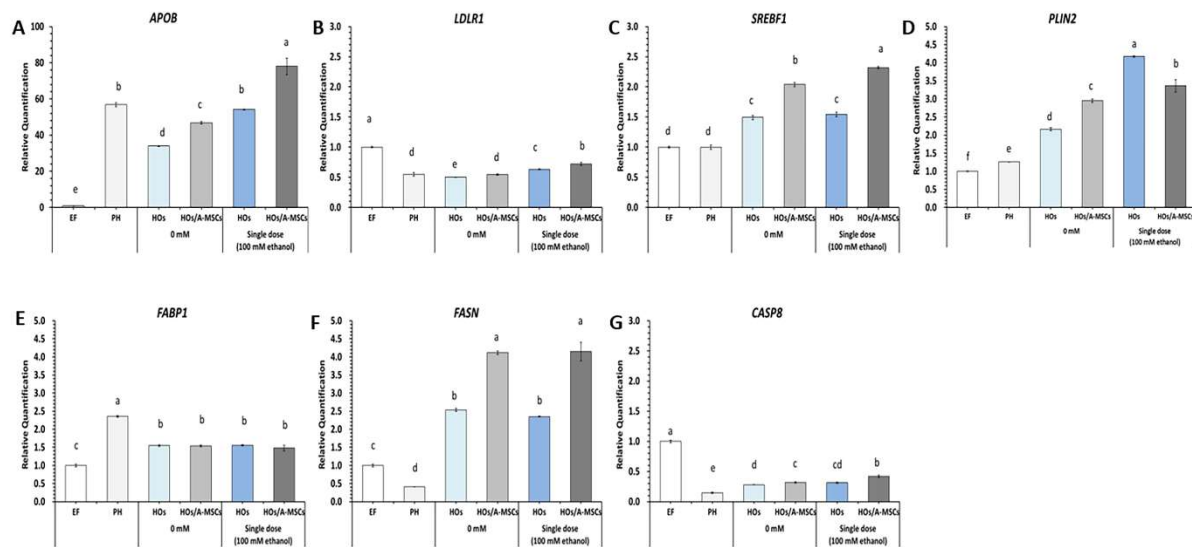

**Figure S2. Pathway analysis of lipid and cell death responses to single-dose ethanol exposure in hepatocyte organoids (HOs).** On day 11, HOs co-cultured with A-MSCs (HO/A-MSCs) and HOs cultured alone were incubated in fresh organoid culture medium with or without 100 mM ethanol for an additional 72 h. mRNA was extracted from HOs for real-time PCR analysis of *APOB* (A), *LDLR1* (B), *SREBF1* (C), *PLIN2* (D), *FABP1* (E), *FASN* (F), and *CASP8* (G) gene expression. The data are presented as the mean relative quantification (RQ)  $\pm$  maximum and minimum values, normalized to that in ear fibroblasts (EF). Statistical significance was assessed using a one-way analysis of variance (ANOVA) with  $a-e$   $p < 0.05$  as the threshold after five repetitions. PH, primary hepatocytes isolated from pig livers.

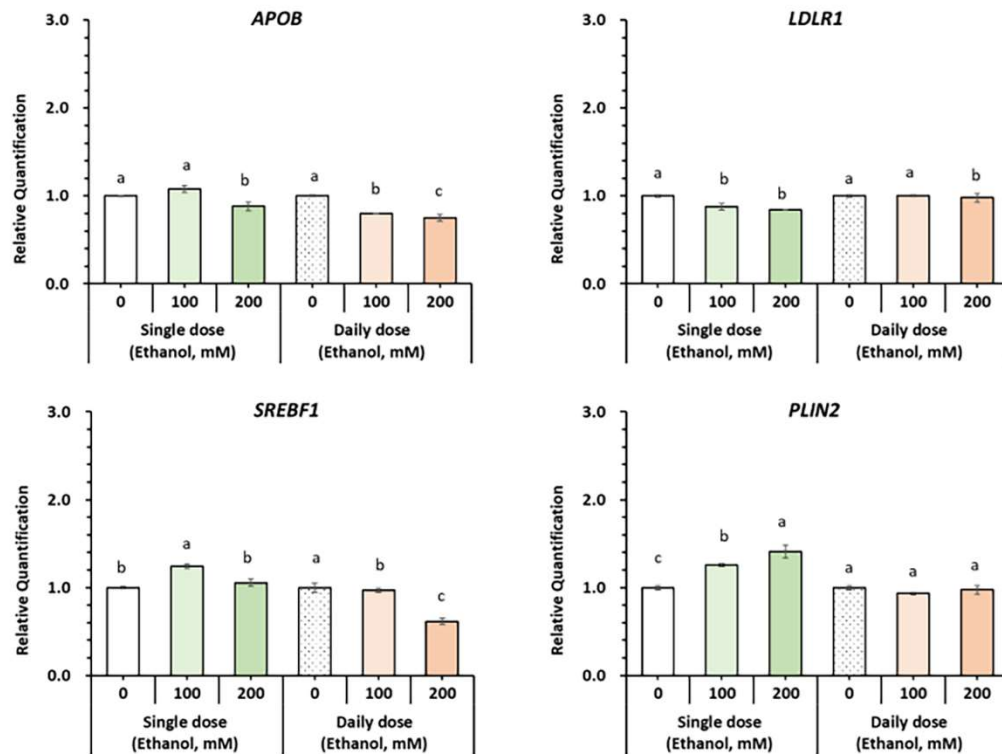

**Figure S3. Effect of ethanol exposure on the expression of lipid metabolism and apoptosis genes in A-MSCs.** A-MSCs were seeded at a density of 4,000 cells/well in a 24-well plate and exposed to a single or daily dose of 0, 100, or 200 mM ethanol for three days. The expression of genes related to lipid metabolism, *APOB*, *LDLR1*, *SREBF1*, and *PLIN2*, were analyzed. The data are presented as the mean relative quantification (RQ)  $\pm$  the maximum and minimum values, normalized to that in A-MSCs without ethanol for RQ in each of the single and daily treatment groups. Statistical significance was assessed using one-way analysis of variance (ANOVA) with  $p < 0.05$  as the threshold after five repetitions.
